# Supplementary material for: Differential Changes in Retinal Cyst Characteristics in inner versus outer retina in Diabetic Macular Edema Treated With Ang-2/VEGF-A Dual Inhibitor
Source: Research Square preprint supplement (doi:10.21203/rs.3.rs-8563078/v1), 2026-01-22
Supplement: Supplementary file 1 [file 210b5e3c6c24a8dbe4b702f7.docx]

**Table 2: Cysts Parameters**

| **Cysts Parameters (Mean)** | | **Baseline** | **End of the loading dose** | **P value** |
| --- | --- | --- | --- | --- |
| Total cysts No. (SD) | | 16.49 (10.4) | 7.32 (6.1) | <.01* |
| IC No. (SD) | | 8.77 (5.9) | 2.03 (3.1) | <.01* |
| OC No. (SD) | | 8.03 (5.2) | 5.32 (3.5) | .08 |
| ODN IC Px (SD) | | 53.486 (12.321) | 33.410 (28.834) | .01* |
| ODN OC Px (SD) | | 50.535 (10.361) | 58.582 (12.659) | .04* |
| ODR IC Px (SD) | | 6.86 (3.3) | 4.39 (4.6) | .07 |
| ODR OC Px (SD) | | 7.15 (4.6) | 9.10 (4.5) | .21 |
|  | |  |  |  |
| Total cysts area Px2 (SD) | | 0.40 (0.2) | 0.20 (16.9) | .03* |
| Area IC Px2 (SD) | | 0.03 (0.03) | 0.01 (0.03) | .03* |
| Area OC Px2 (SD) | | 0.19 (0.2) | 0.06 (0.04) | .03* |
| Circularity IC (SD) | | 0.57 (0.09) | 0.33 (0.3) | <.01* |
| Circularity OC (SD) | | 0.65 (0.07) | 0.64 (0.08) | .68 |
|  |
|  |

Abbreviations: IC: Inner Cysts; OC: Outer Cysts; ODN: Optical Density; Px: Pixel; ODR: Optical Density Ratio. SD: Standard Deviation; p* significative.
