# Supplementary material for: Differential Changes in Retinal Cyst Characteristics in inner versus outer retina in Diabetic Macular Edema Treated With Ang-2/VEGF-A Dual Inhibitor
Source: Research Square preprint supplement (doi:10.21203/rs.3.rs-8563078/v1), 2026-01-22
Supplement: Supplementary file 2 [file 6ed0a0700ed36048bb5ee40b.docx]

**Table 1: Baseline Demographic and Ocular Characteristics**

| **Demographic characteristics** | **Patients (n=12)** |
| --- | --- |
| Age, mean (SD), y | 64.8 (8.7) |
| Sex, Female, No. (%) | 5 (41.6) |
| Type 1 DM (%) | 1 (8.3) |
| Type 2 DM (%) | 11(91.6) |
| Duration of DM, mean (SD), y | 11.55 (5.8) |
| HbA1c, (%) mean (SD) | 6.7 (1.3) |
|  |  |
| Bilateral eyes (%) | 6 (50) |
|  |  |
| **Eye characteristics** | **Eye (n=18)** |
| BCVA, mean (SD) (ETDRS letters) | 64 (15.2) |
| Pseudophakic (%) | 11(61.1) |
| *DR Grading (%)* |  |
| Moderate NPDR | 11(61.1) |
| Severe NPDR | 1(5.5) |
| PDR | 6 (33.3) |

_________________________________________________________________

Abbreviations: SD: Standard Deviation; DM: Diabetes Mellitus; BCVA: Best Corrected Visual Acuity; DR: Diabetic Retinopathy; NPDR: Non-Proliferative Diabetic Retinopathy; PDR: Non-active Proliferative Diabetic Retinopathy
